# Supplementary material for: Synthesis and Evaluation of Essential Oil-Derived β-Methoxyacrylate Derivatives as High Potential Fungicides
Source: PubMed Central journal article supplement (PMC6154096; doi:10.3390/molecules22050763), 2017-05-08

# Synthesis and evaluation of essential oils-oriented $\beta$ -methoxyacrylate derivatives as highly potential fungicides

Haihuan Su, Wenda Wang, Longzhu Bao, Shuangshuang Wang, Xiufang Cao\*

College of Science, Huazhong Agricultural University, Wuhan, 430070, China

\*Corresponding author: caoxiufang@mail.hzau.edu.cn

## Supporting Information

Representative  $^1\text{H-NMR}$ , and  $^{13}\text{C-NMR}$  spectra for the synthesized compounds

Compd. II-1

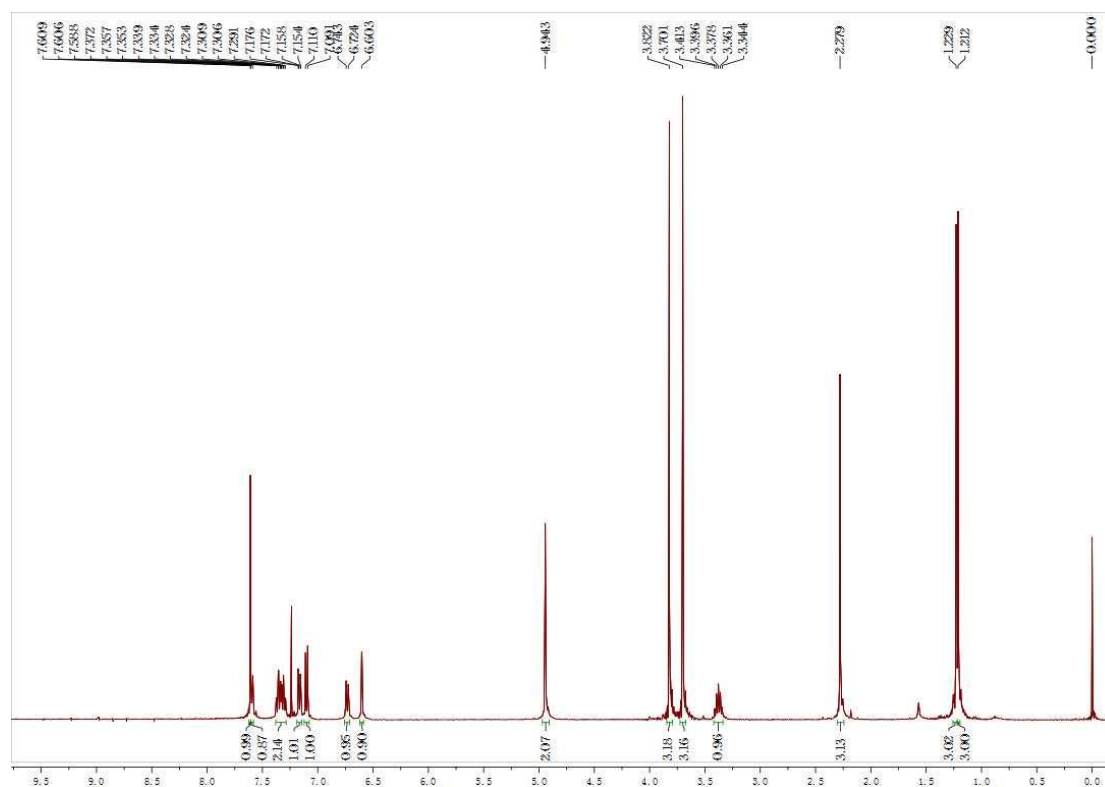

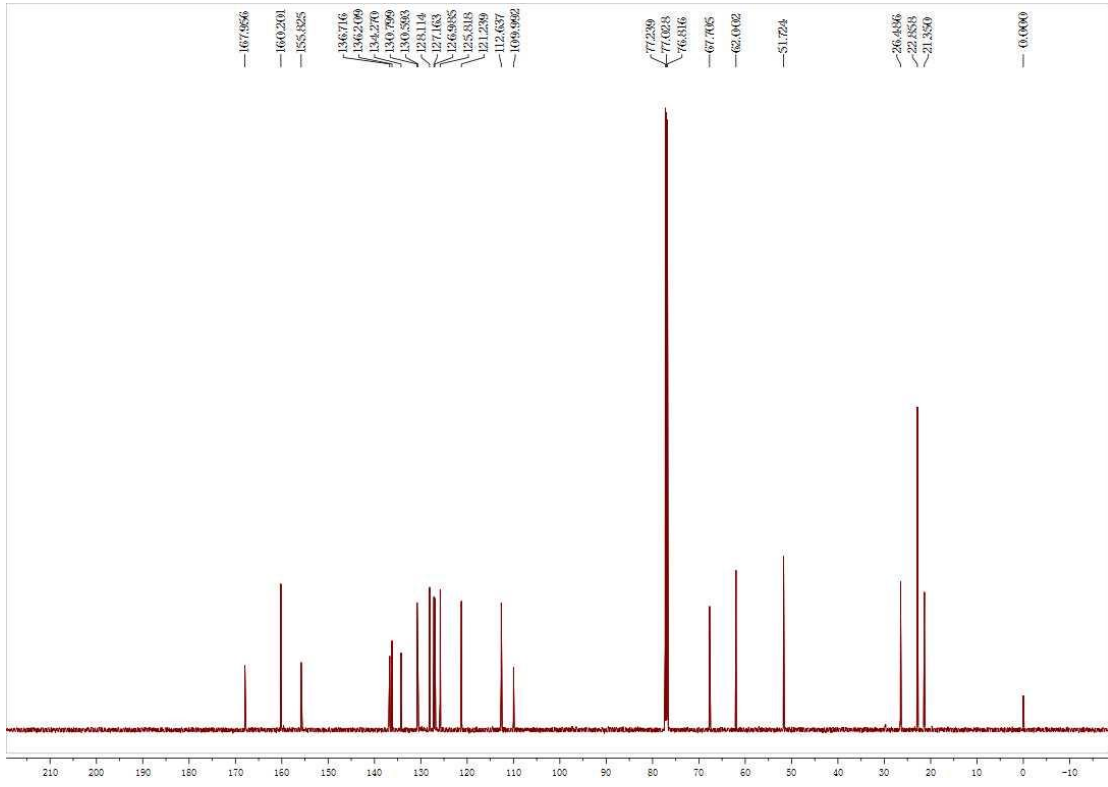

**Compd. II-2**

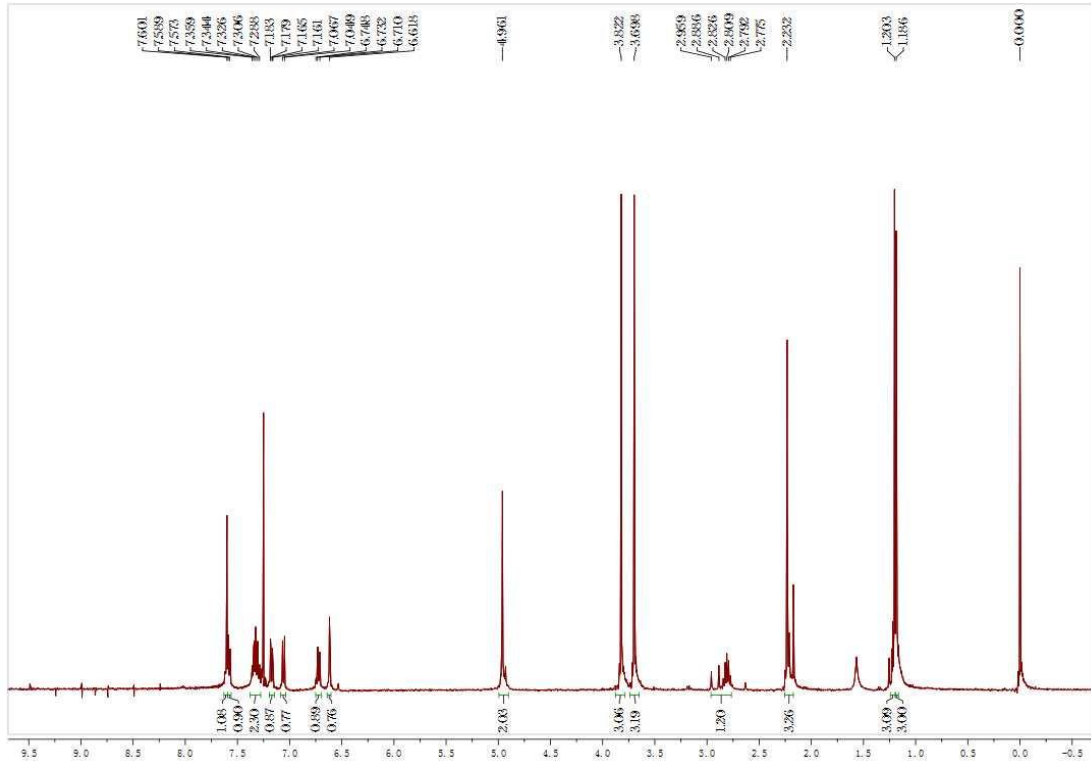

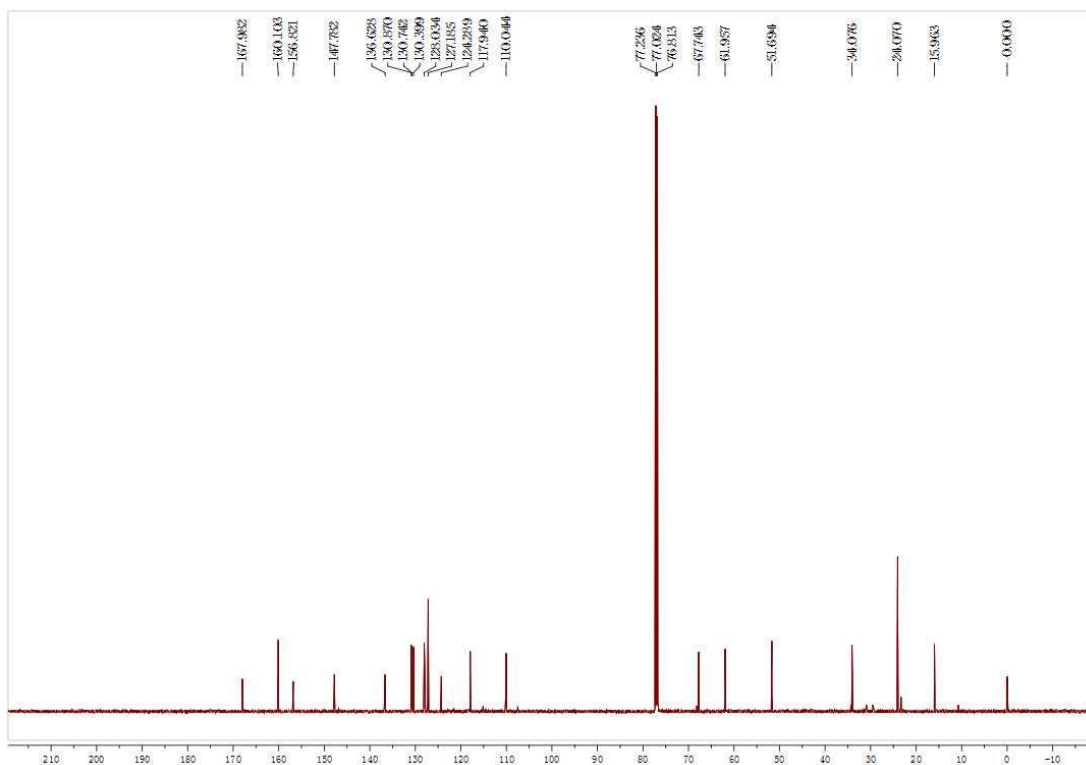

**Compd. II-3**

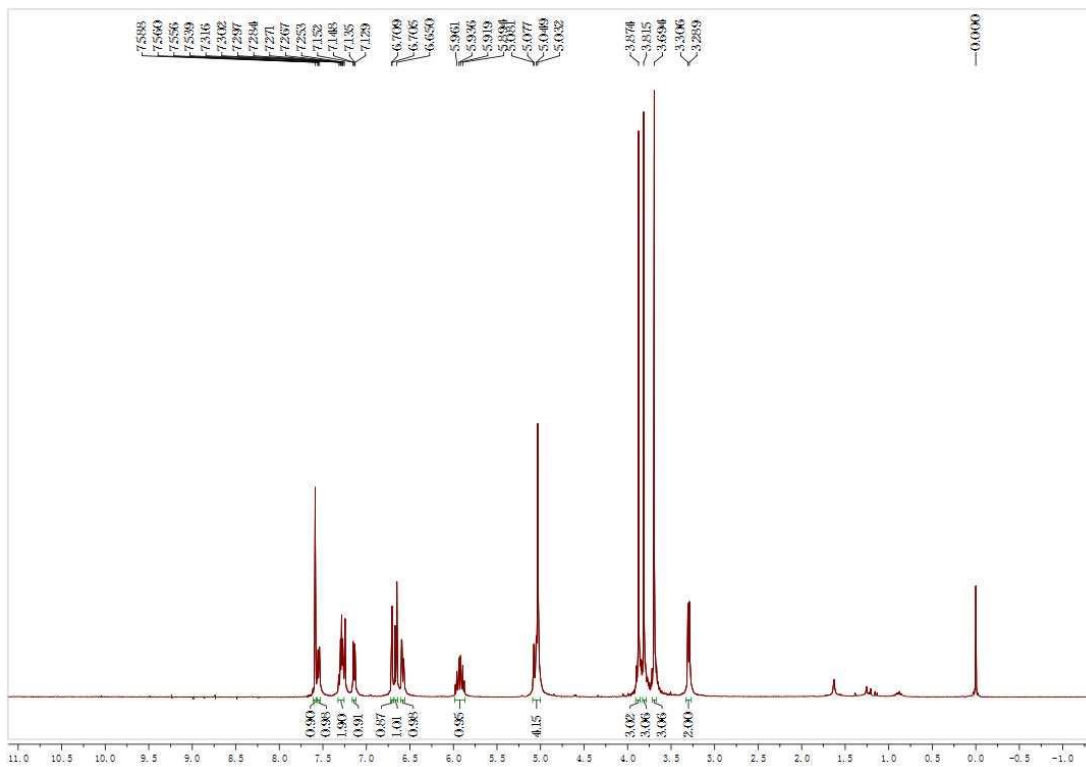

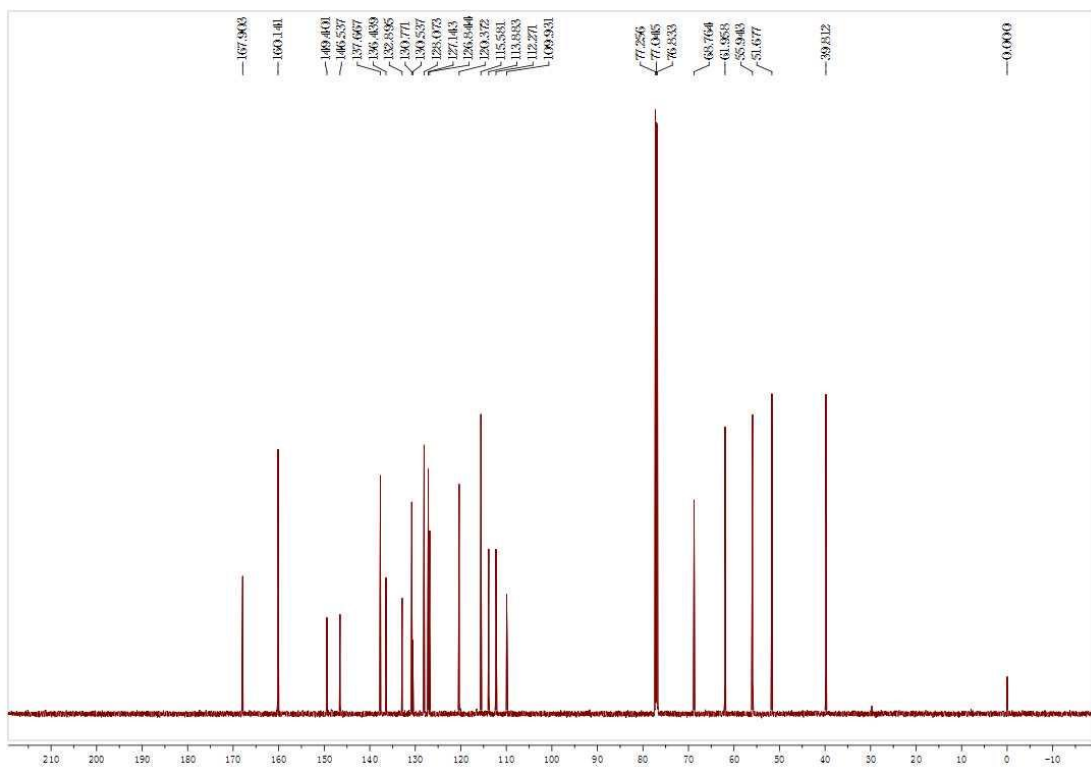

**Compd. II-4**

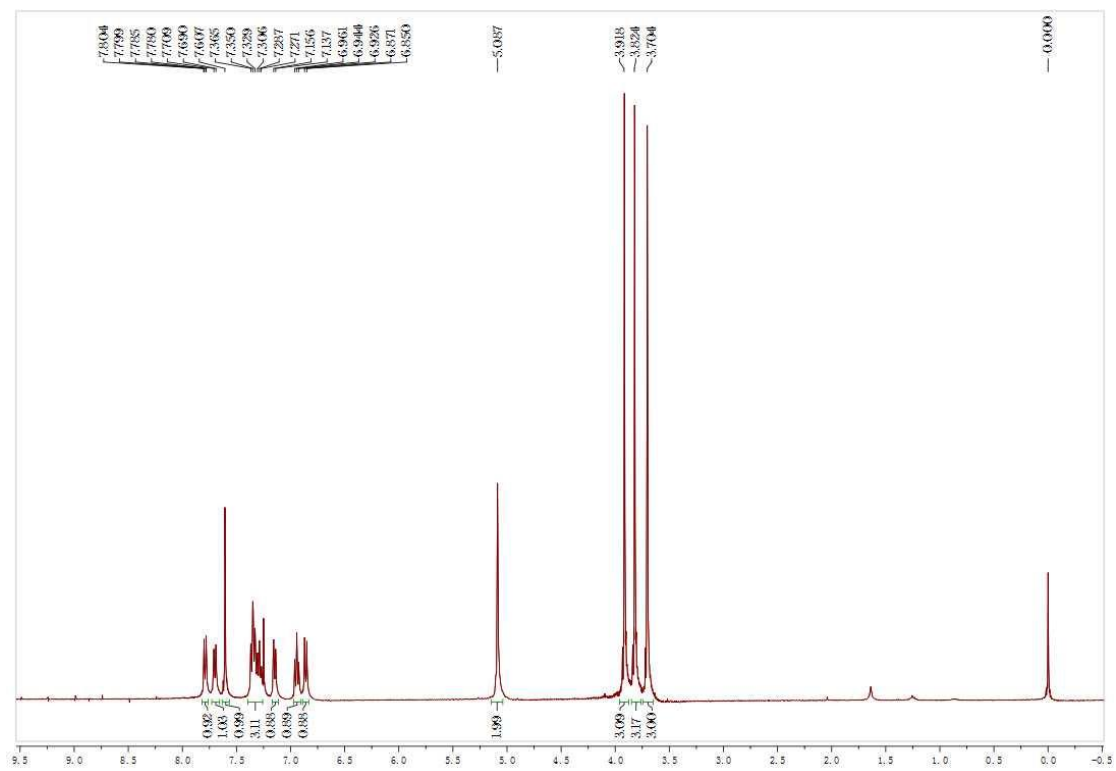

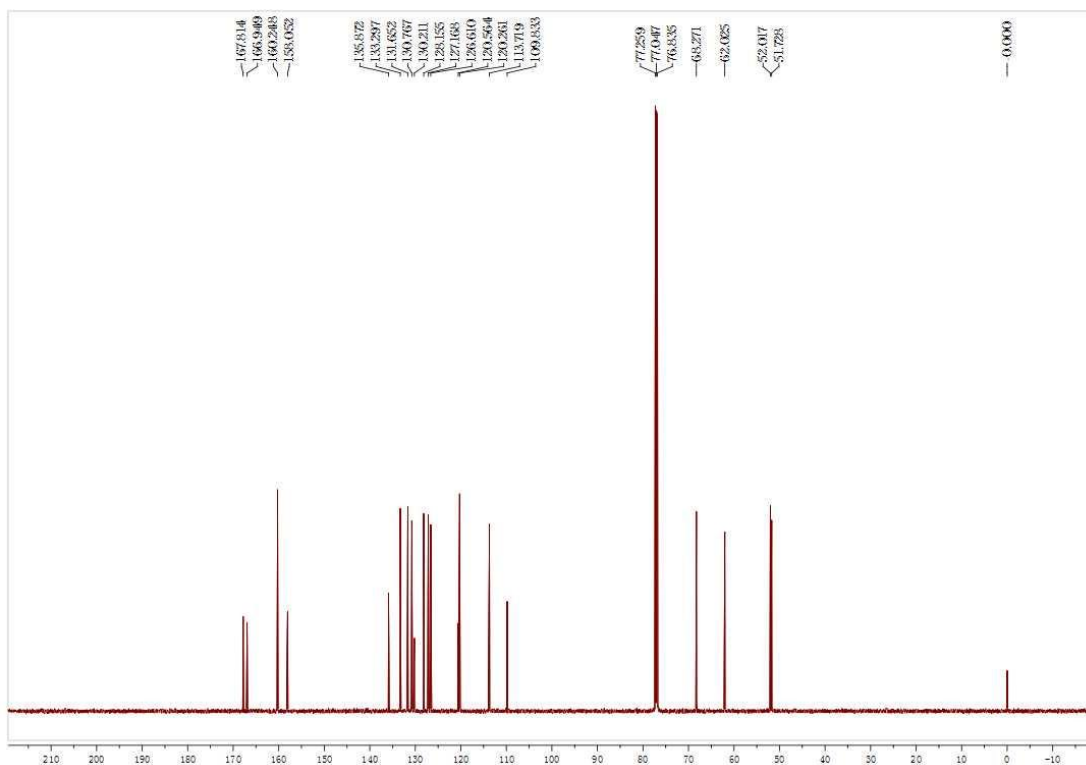

**Compd. II-5**

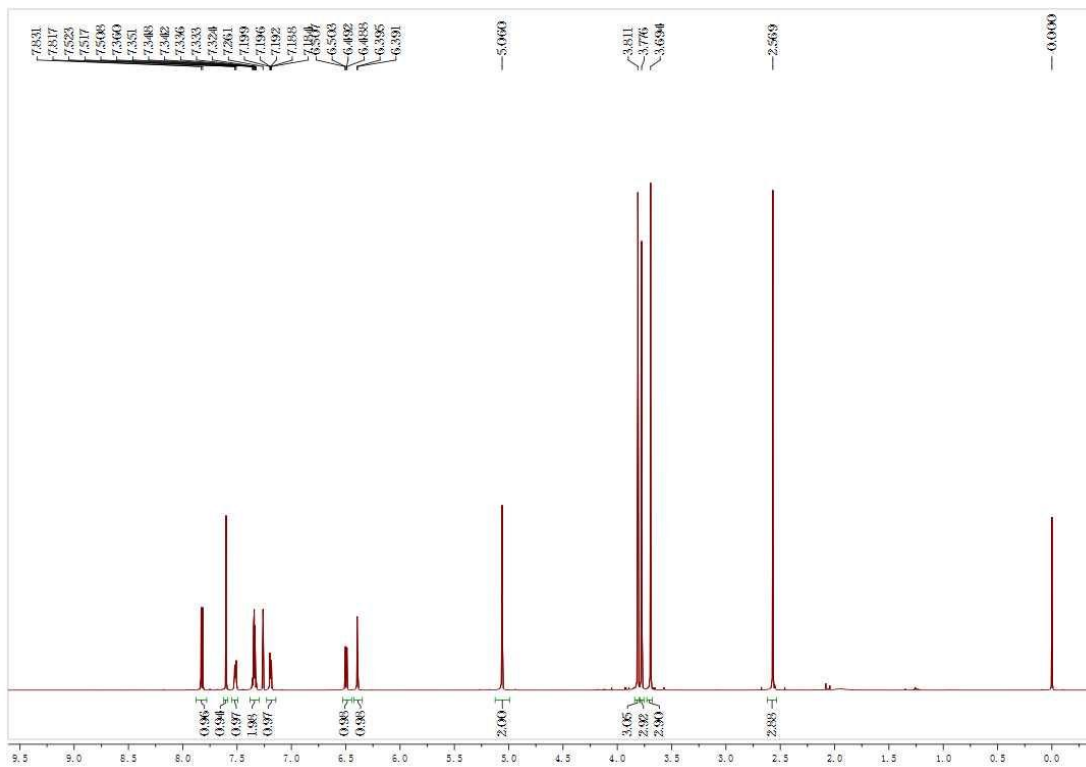

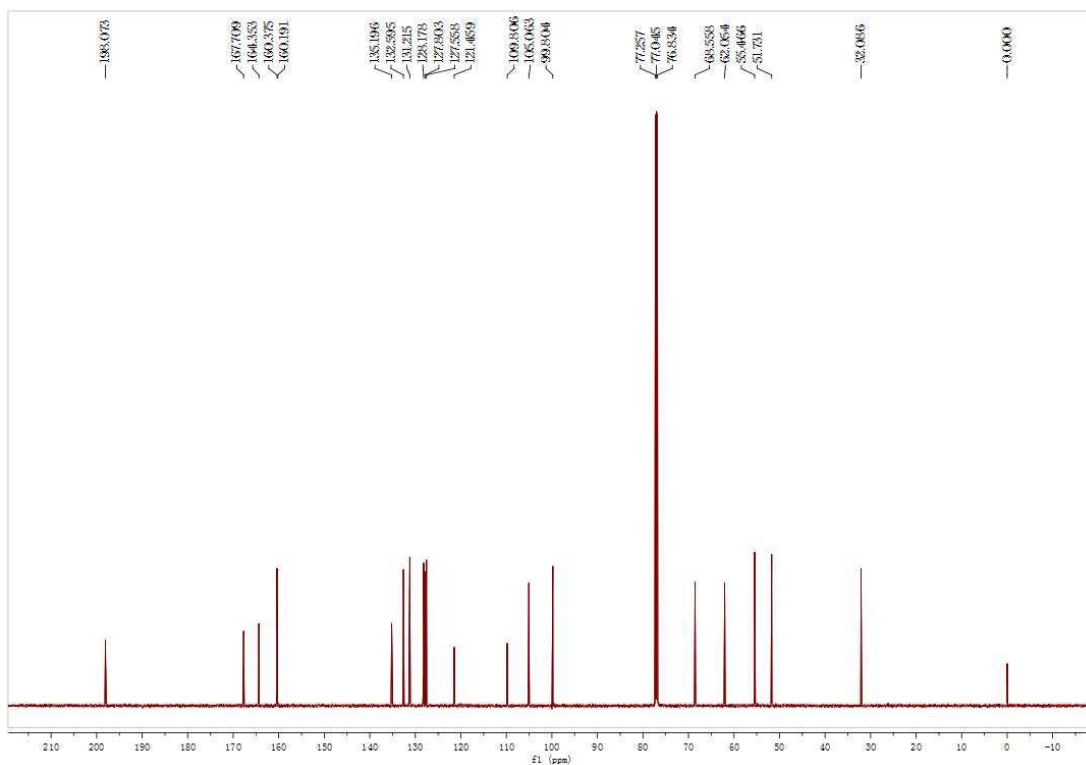

*Compd. II-6*

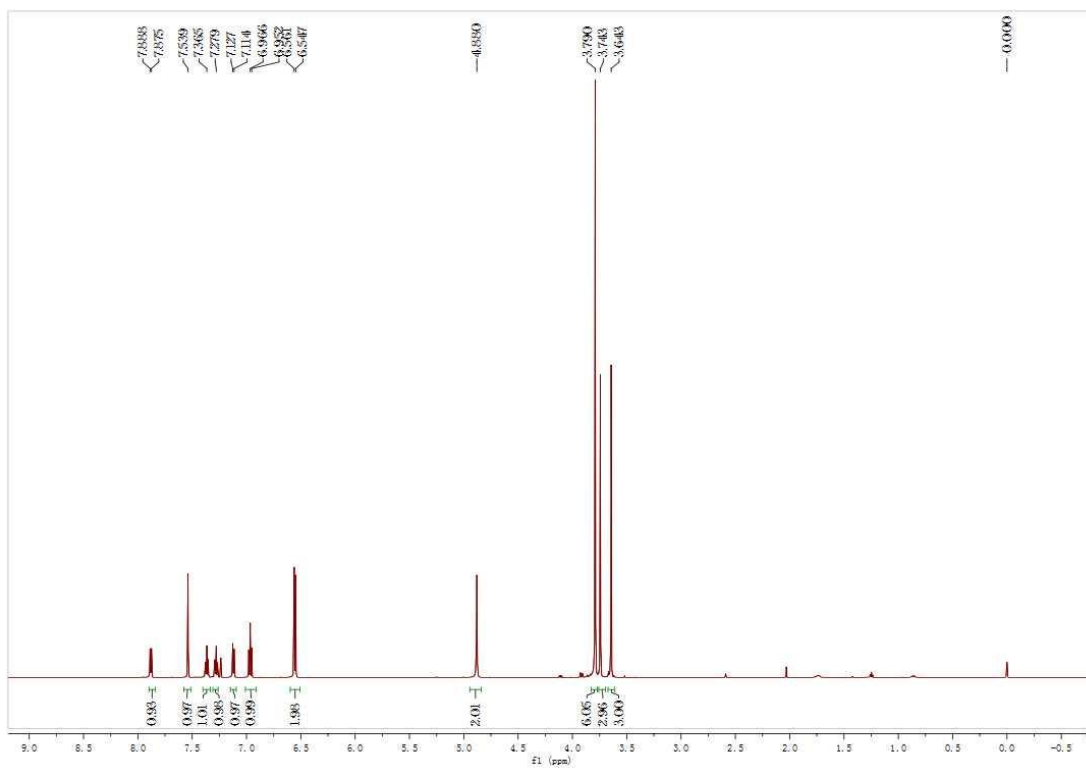

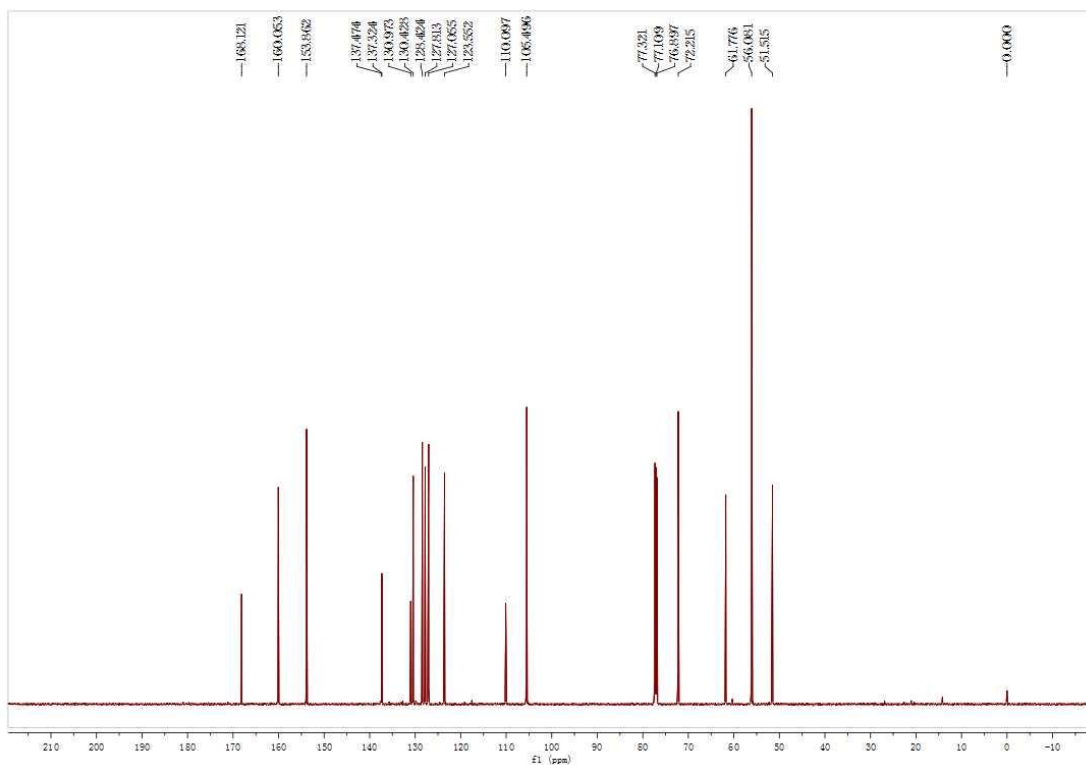

**Compd. II-7**

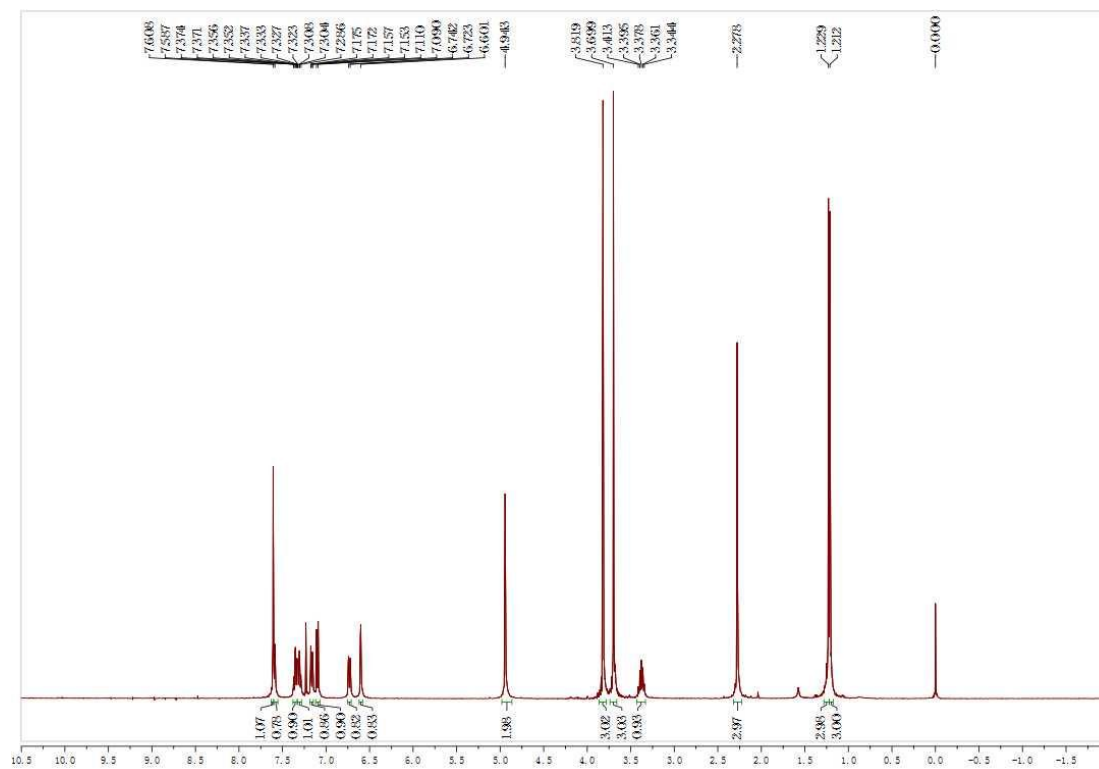

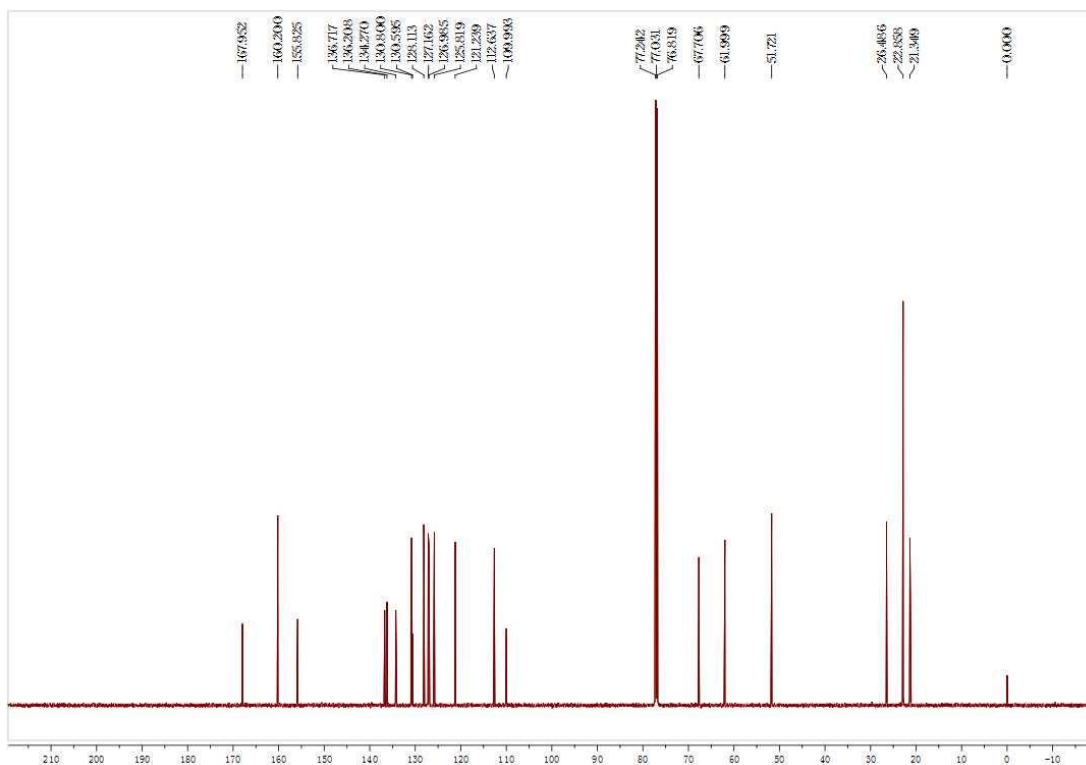

**Compd. II-8**

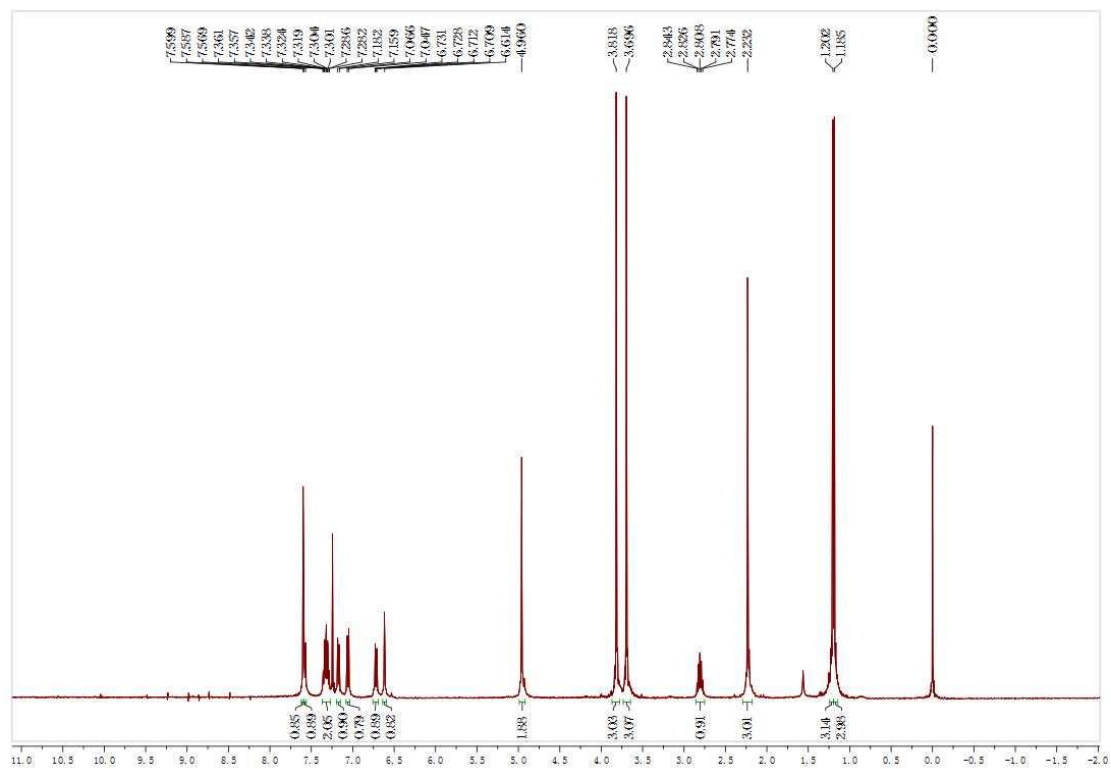



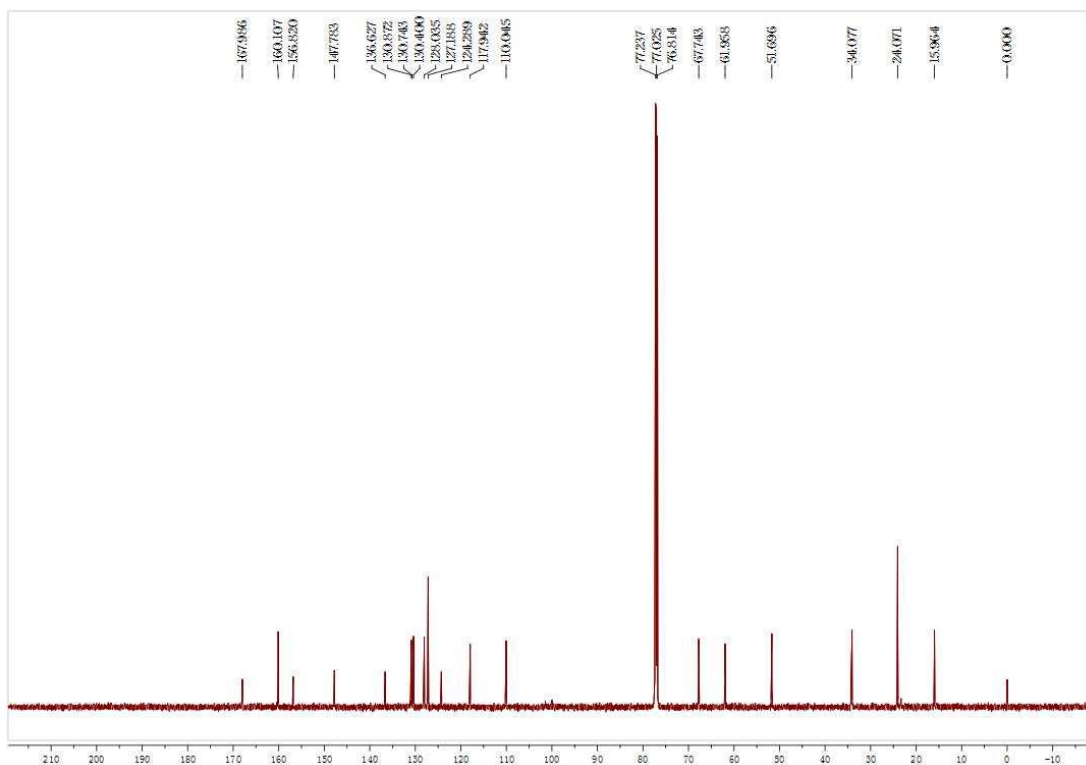

**Compd. II-9**

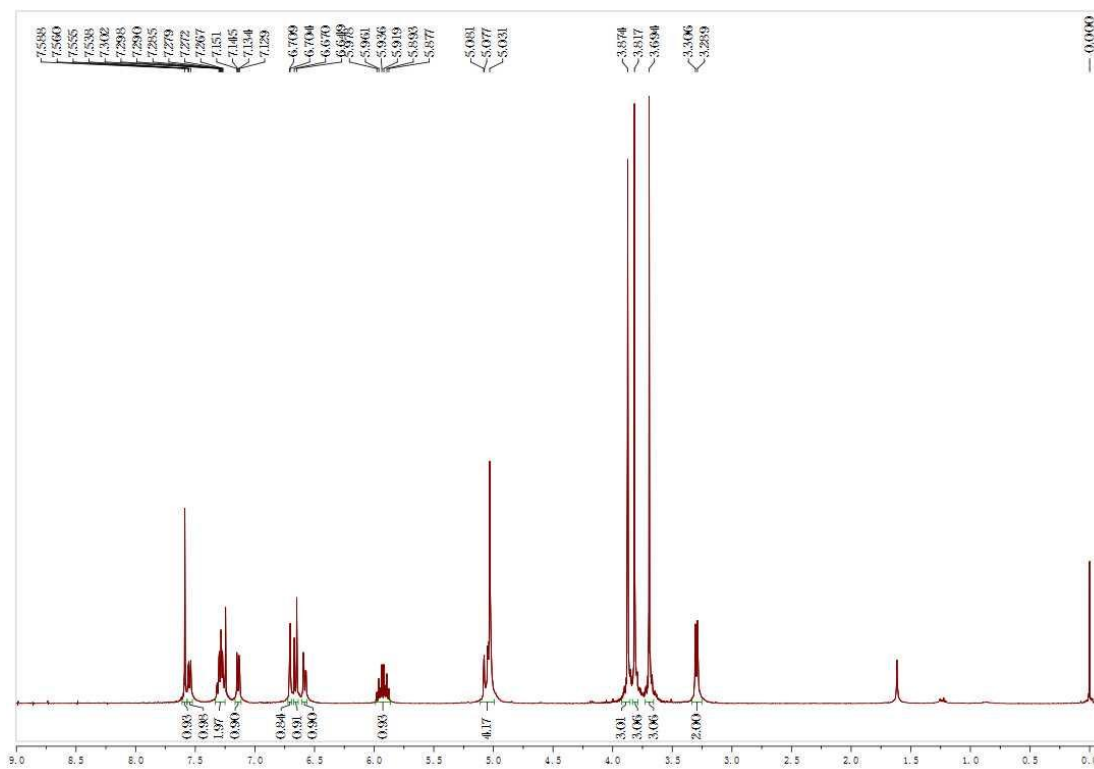

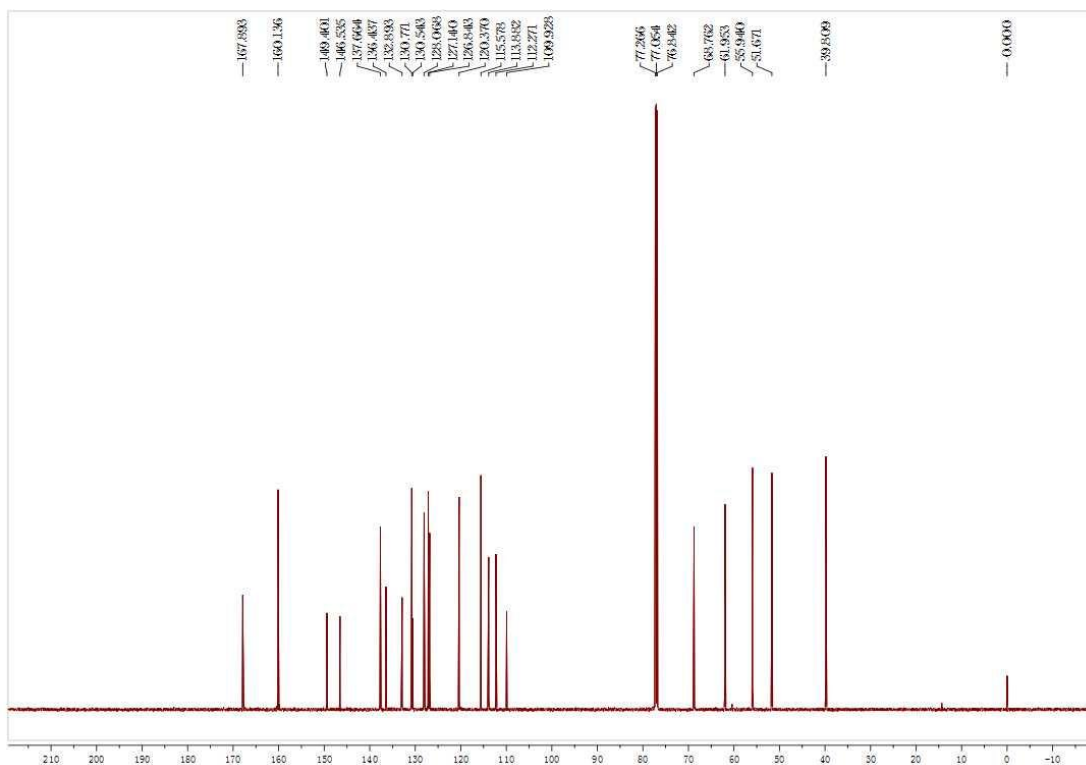

*Compd. II-10*

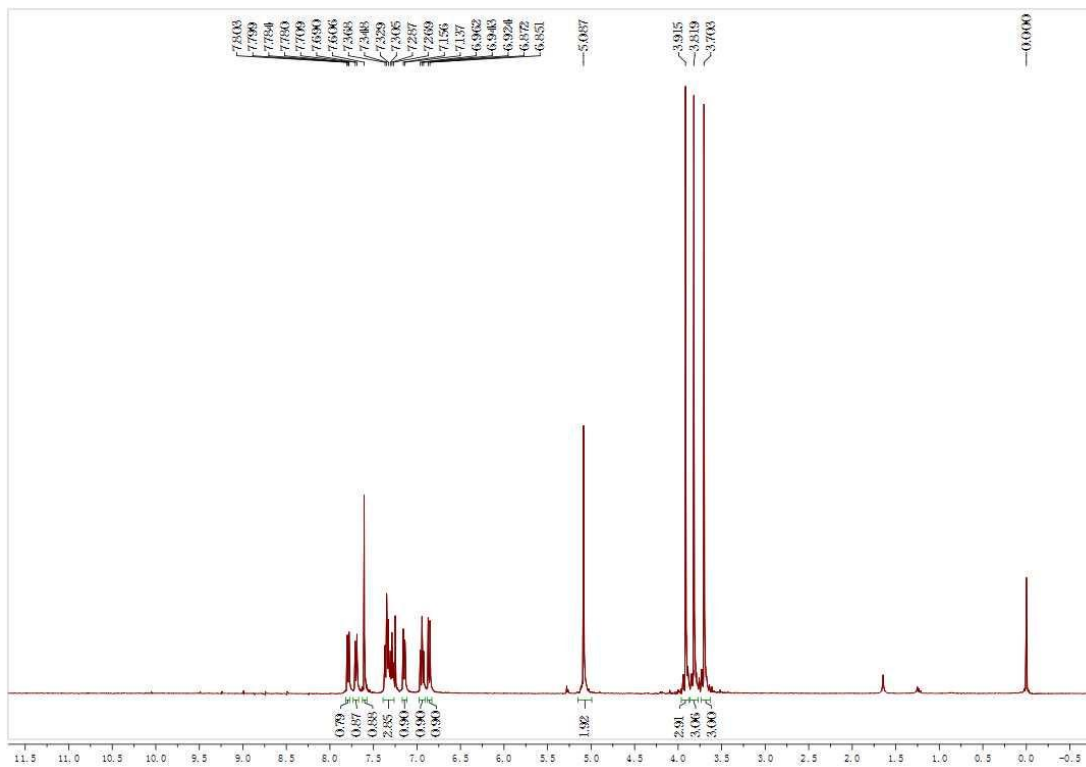

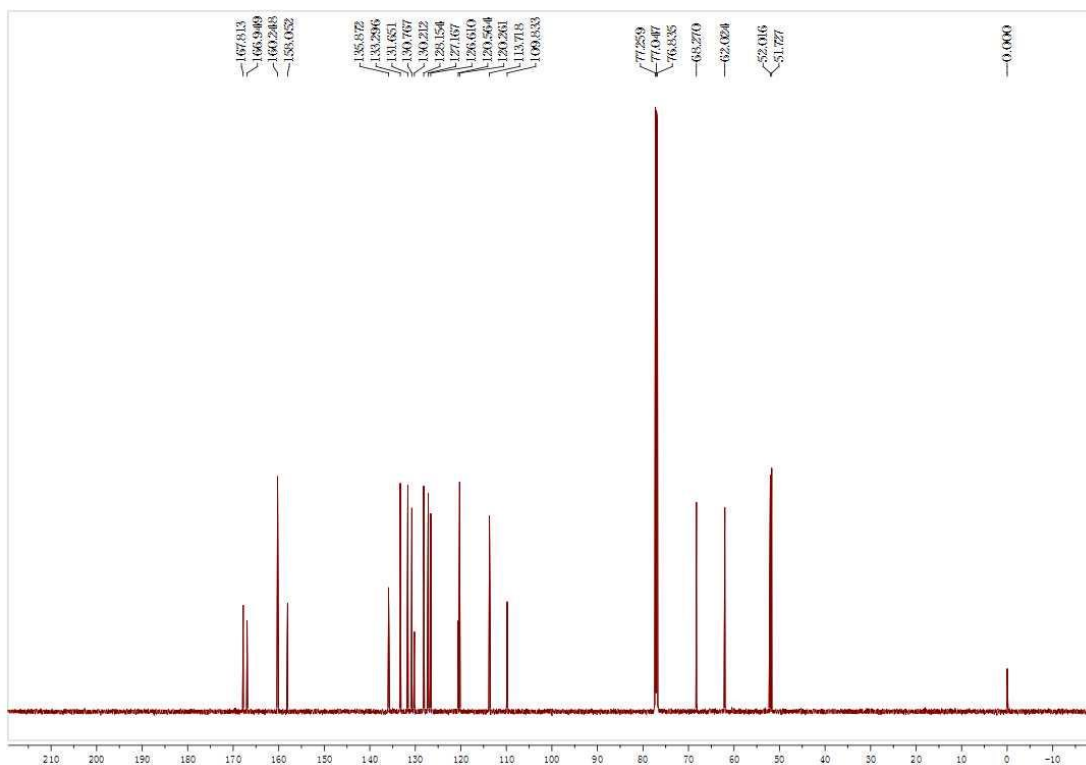

**Compd. II-11**

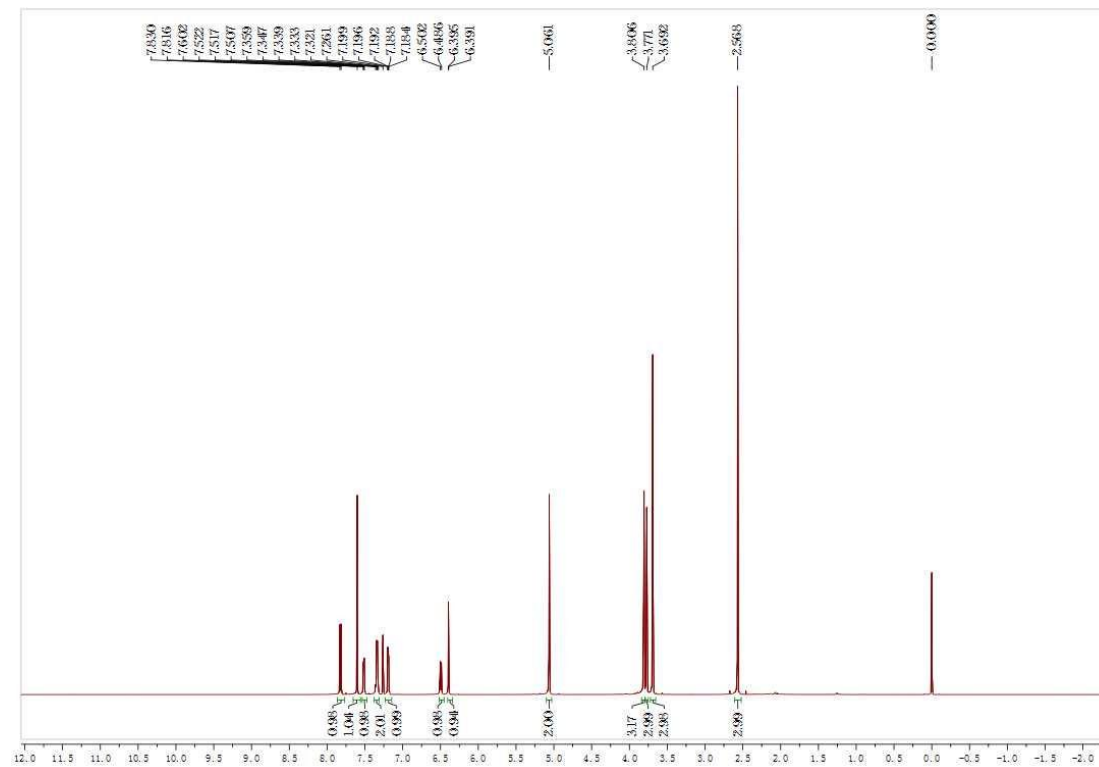

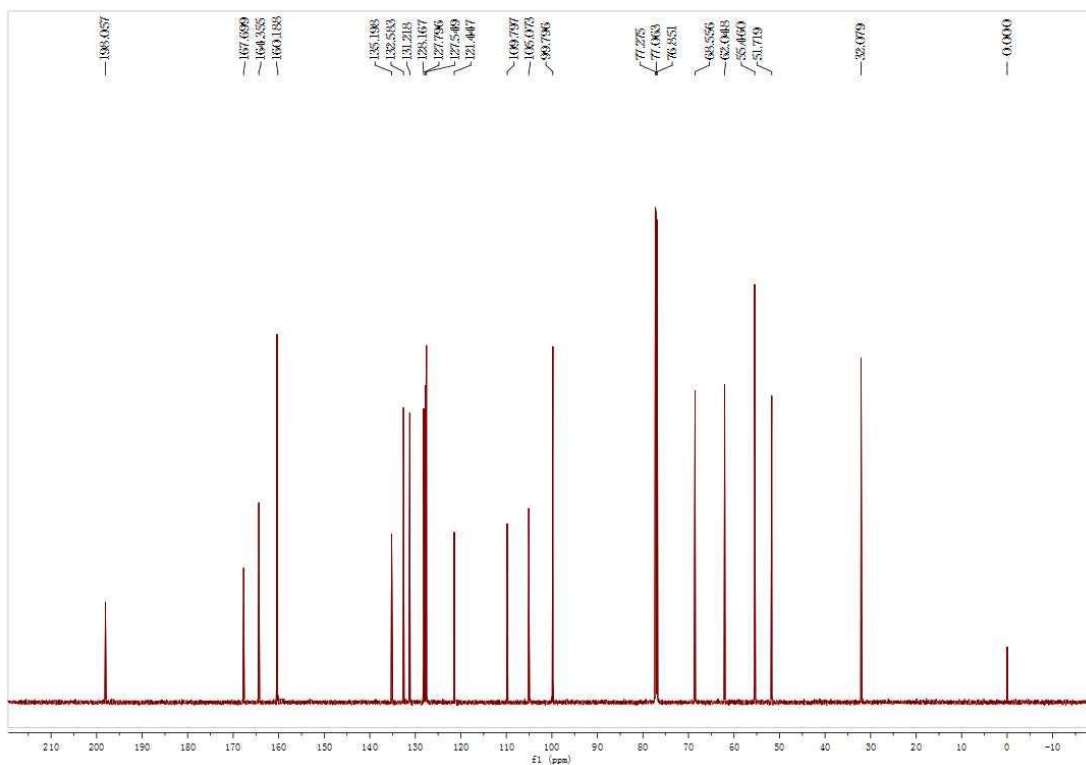

**Compd. II-12**

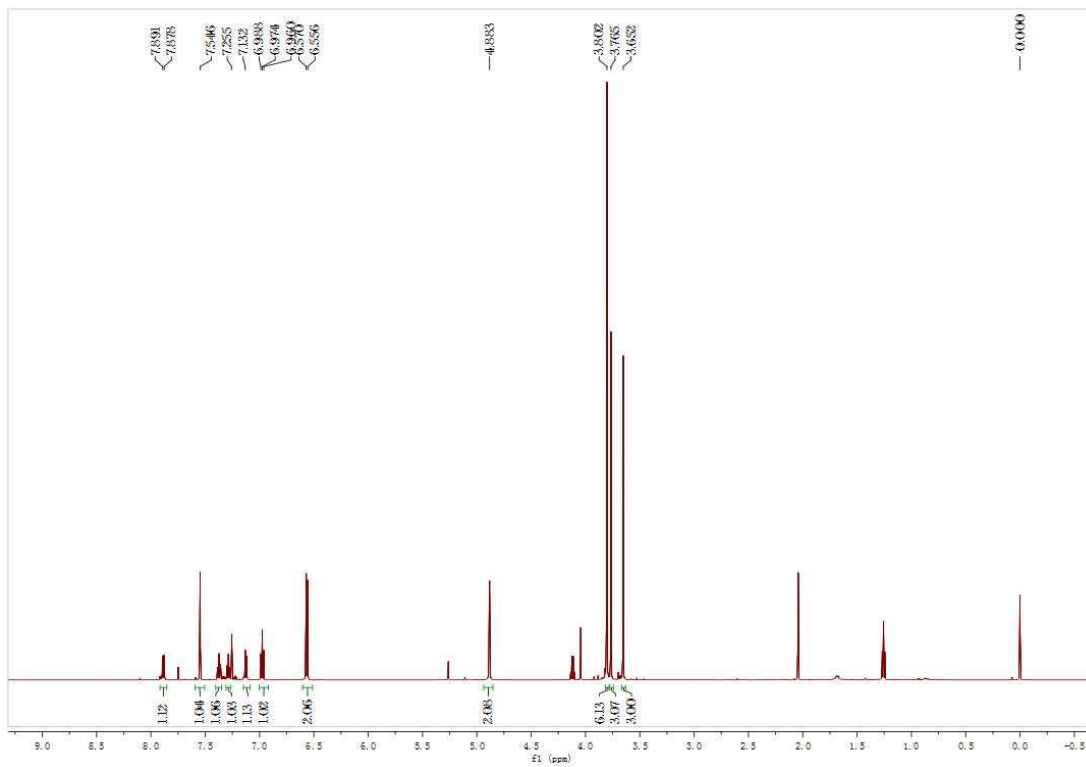

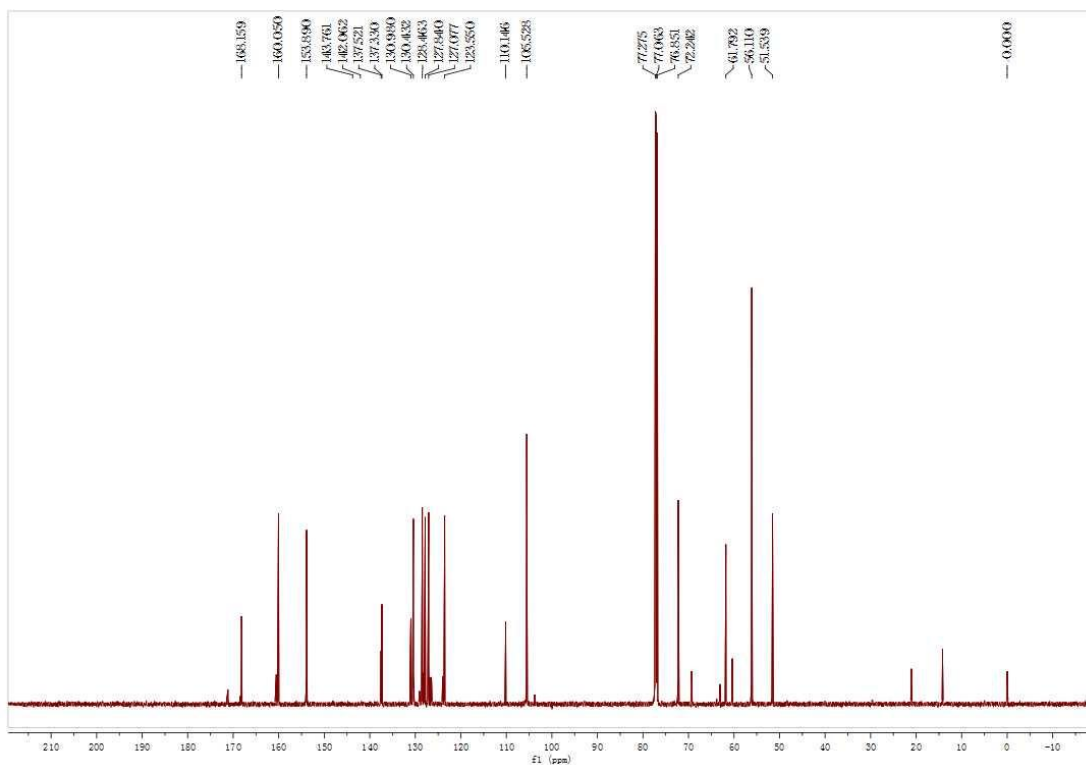

**Compd. II-13**

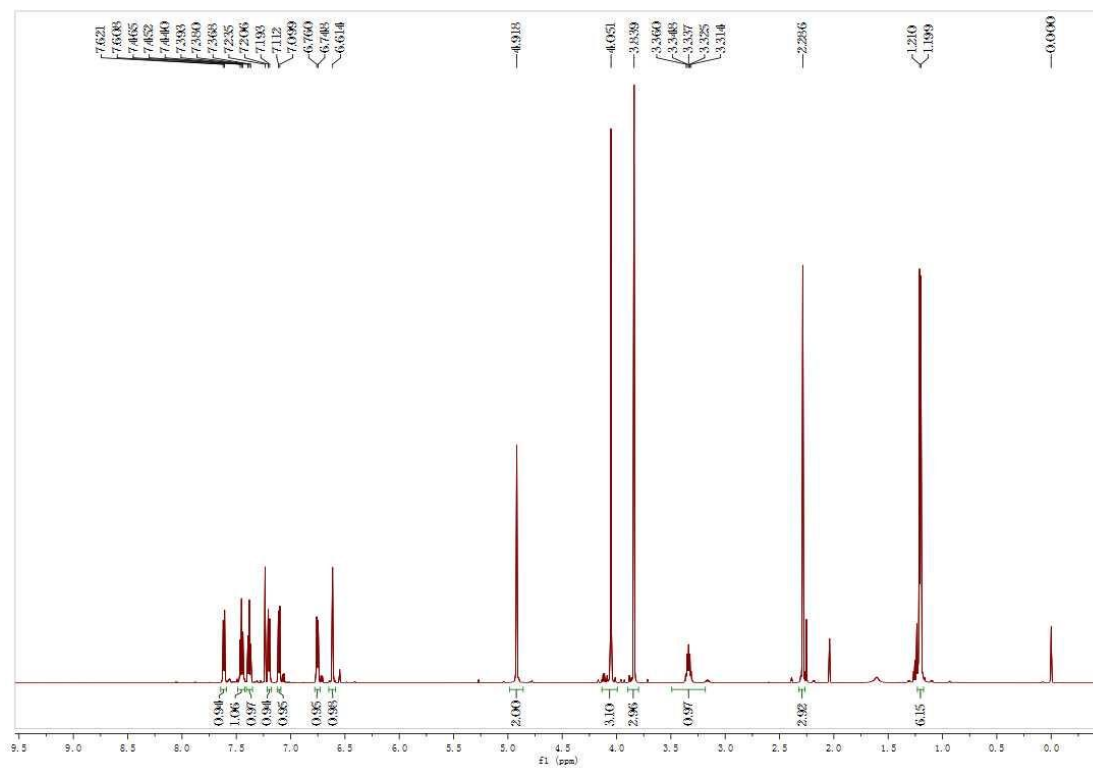

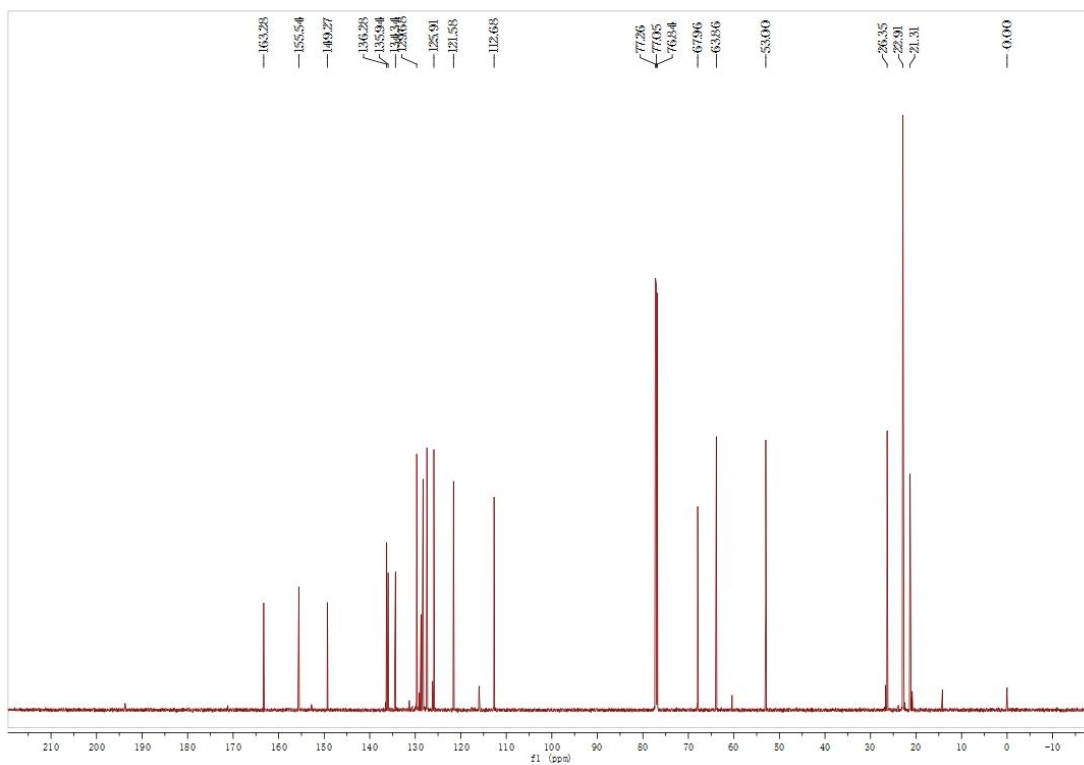

**Compd. II-14**

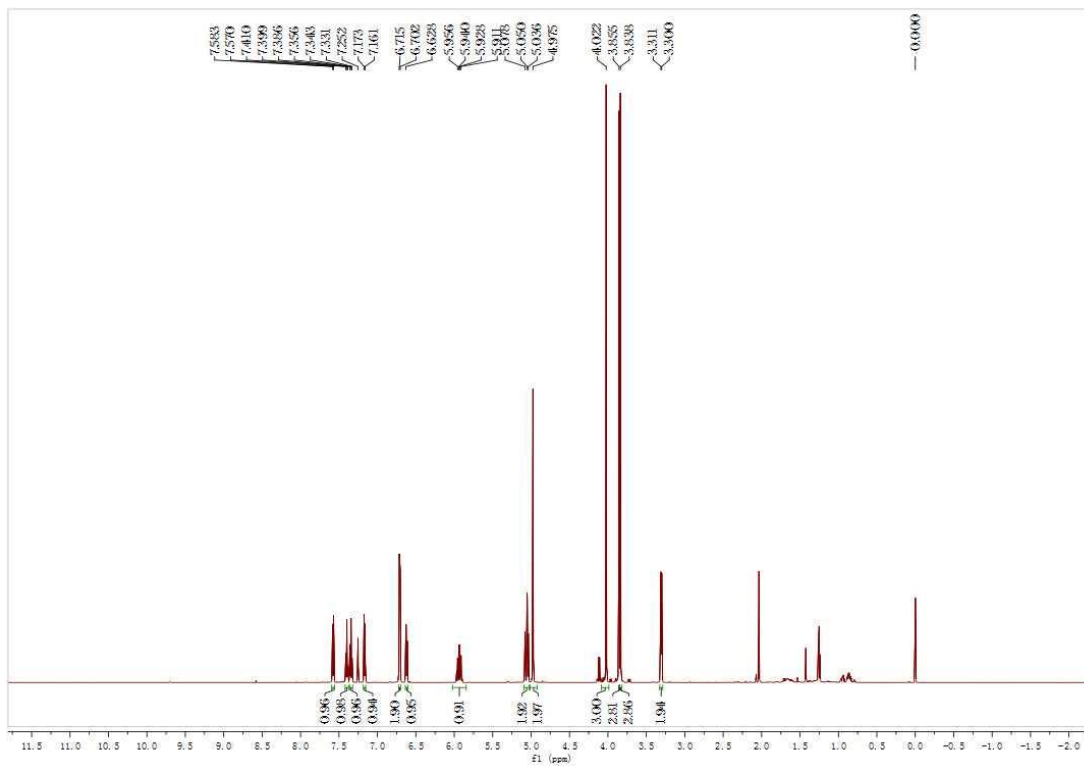

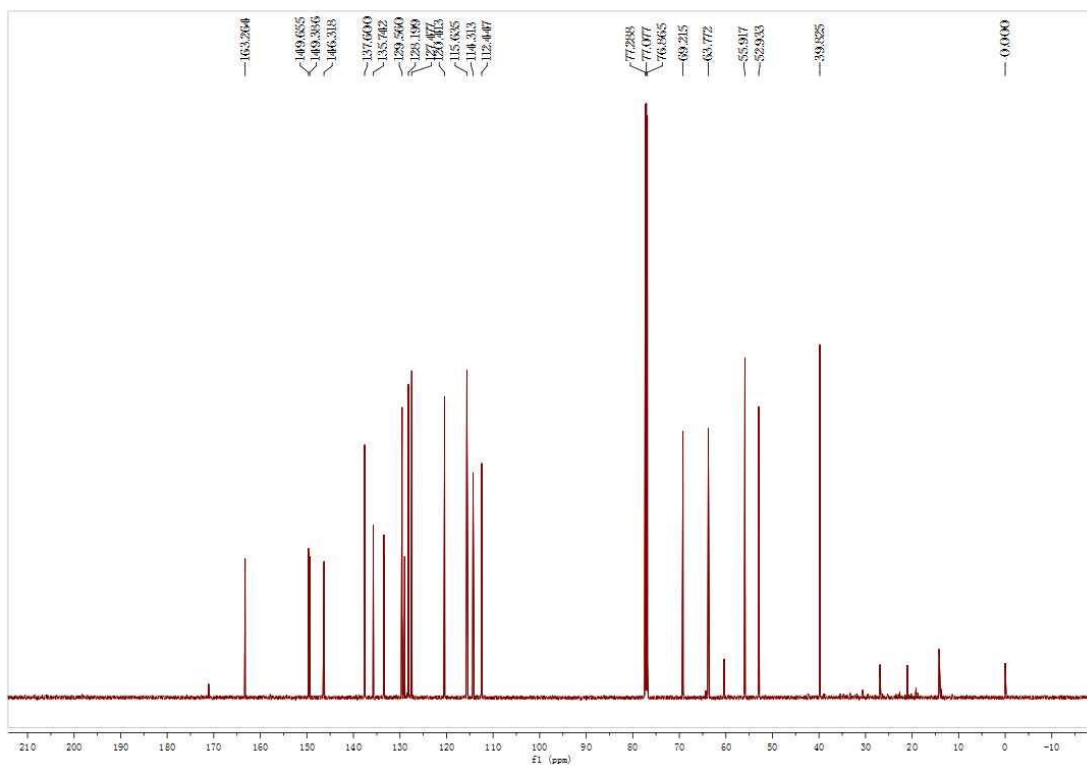

**Compd. II-15**

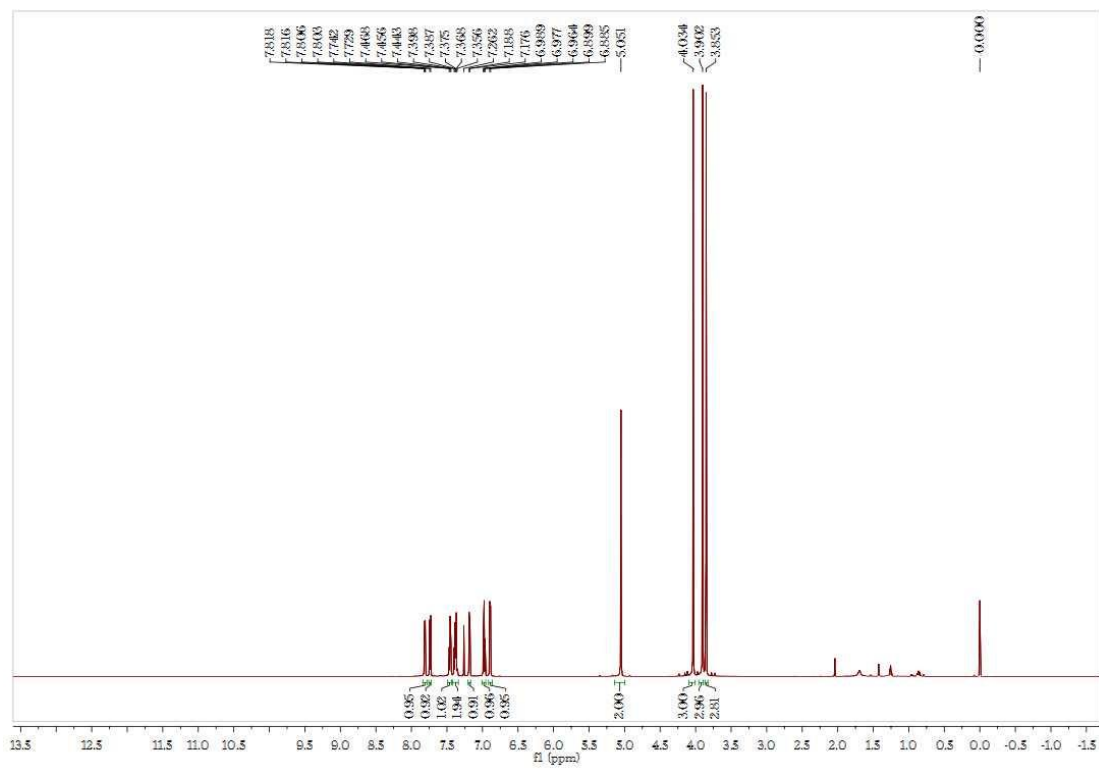

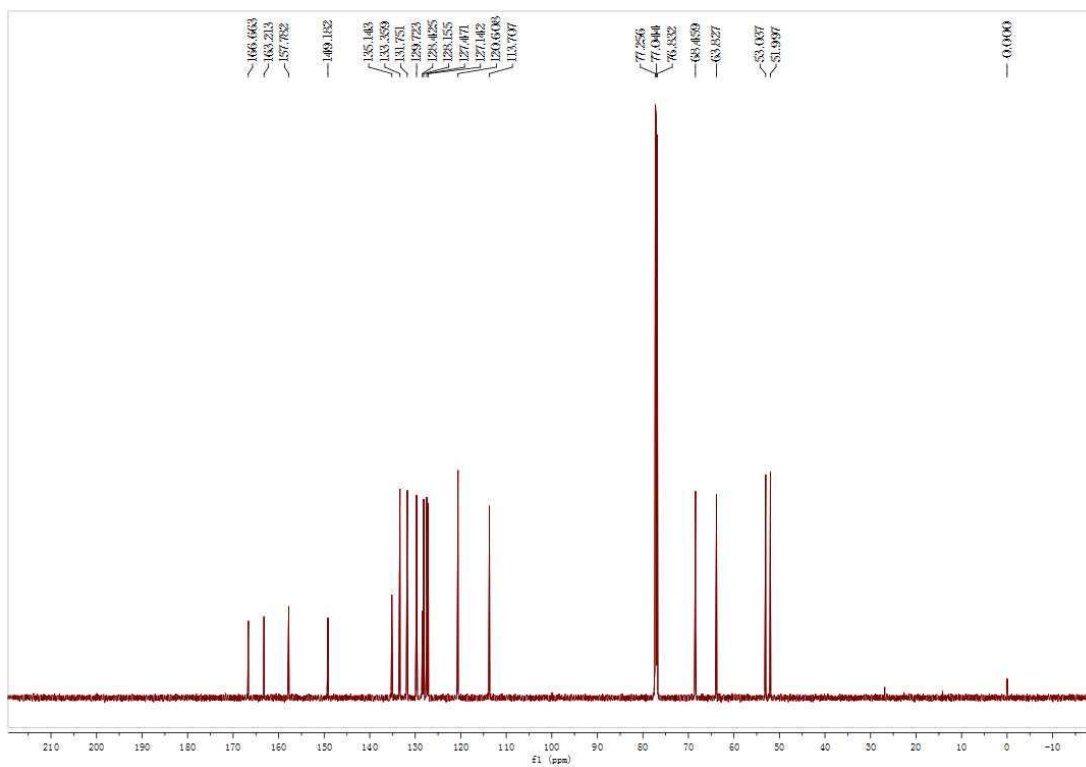

**Compd. II-16**

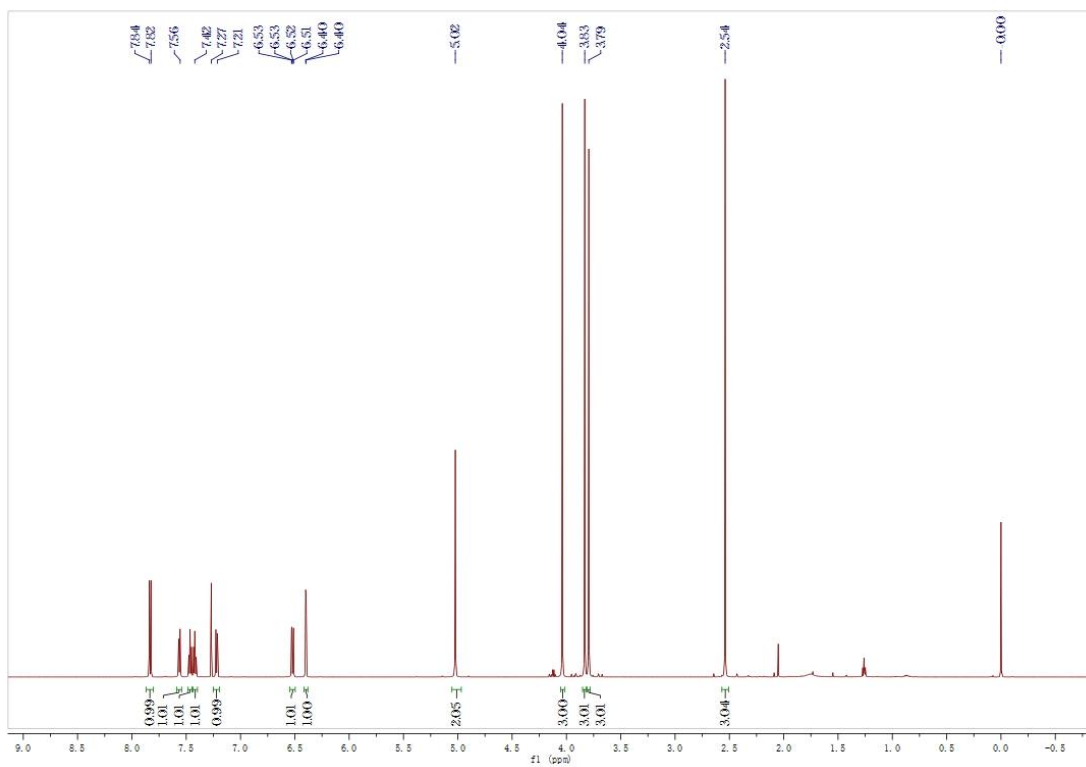



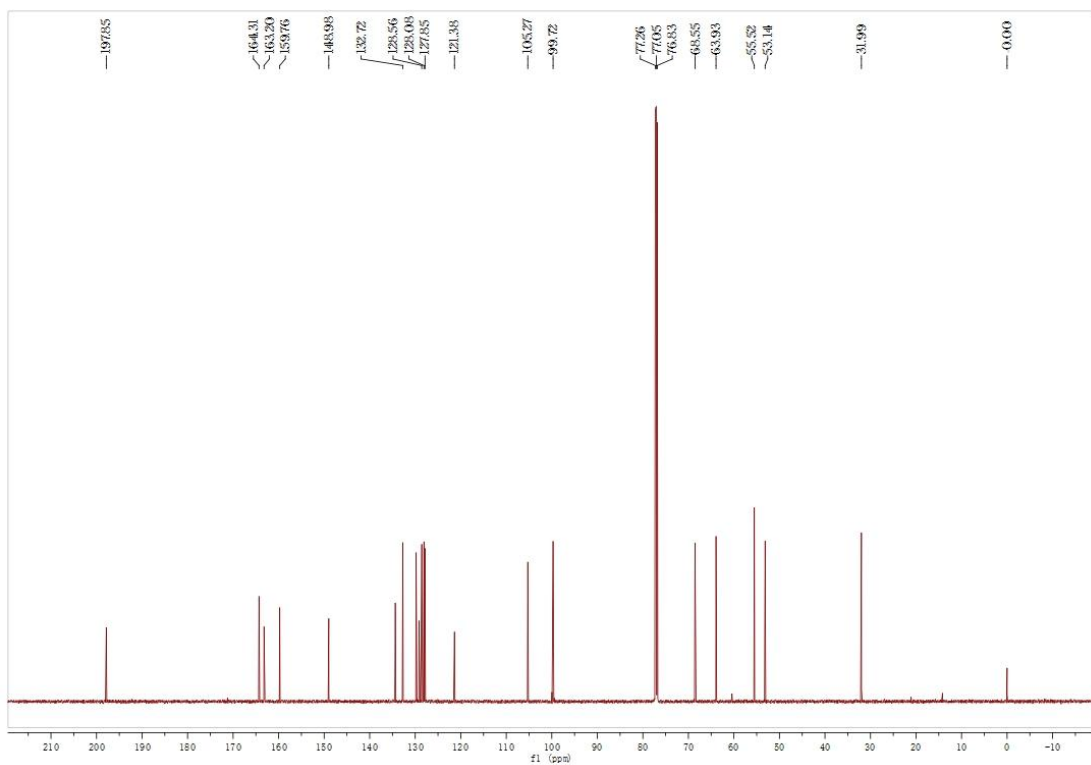

**Compd. II-17**

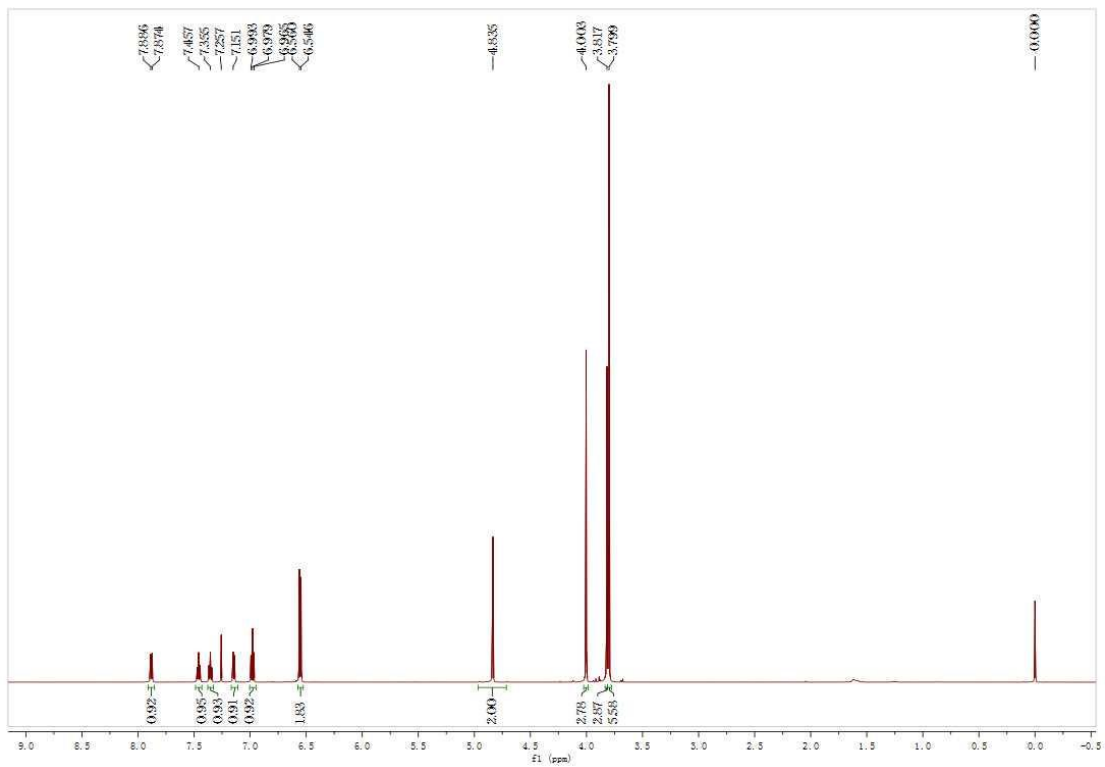

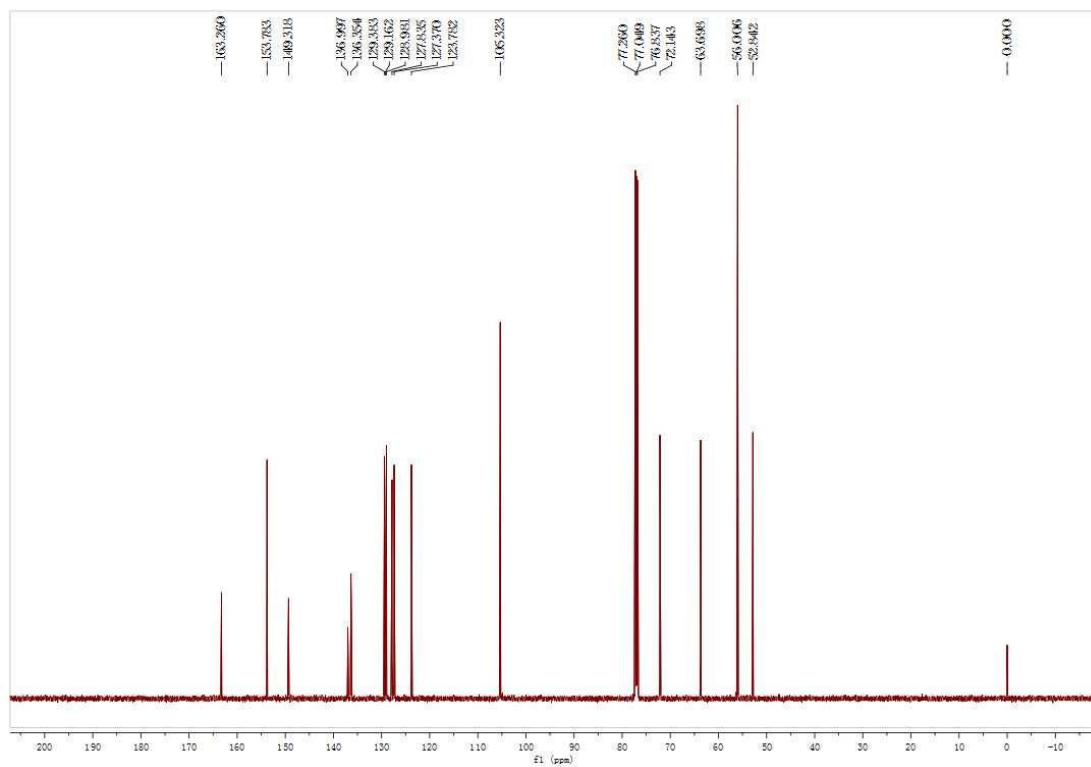

Supplement: molecules-22-00763-s001.pdf [file molecules-22-00763-s001.pdf]
